# Supplementary material
Source: Springer Nature journal article supplement (https://www.springermedizin.de/resource/supplementary/12936_2012_2751_MOESM15_ESM.pdf/9544152)
Supplement: MOESM15 [file 9544152]

**Artemether-Lumefantrine**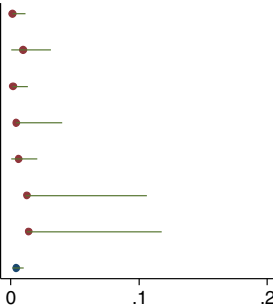**Artesunate-Amodiaquine**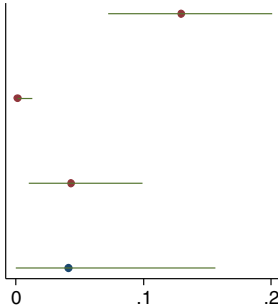**Artesunate+Mefloquine**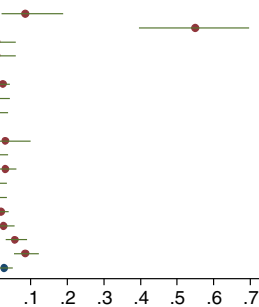**Artesunate+SP**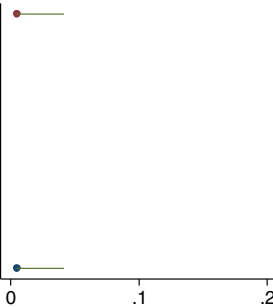**DHA-Piperaquine**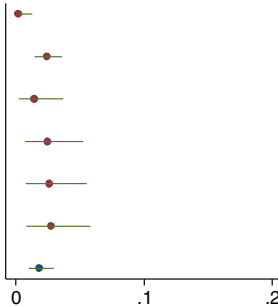**Parasite Prevalence Rate on Day 3**
